# Supplementary material for: Infrared dermal thermometry is highly reliable in the assessment of patients with Charcot neuroarthropathy
Source: Springer Nature journal article supplement (doi:10.1186/s13047-020-00421-z), 2020-01-01
Supplement: MOESM1 [file 18379366]

## Screening Tool / Data Collection Form

---

### SCREENING FOR ELIGIBILITY

Date of assessment: \_\_\_\_\_

Diabetes mellitus: Yes  No  *If NO, exclude*

Charcot foot: Yes  No  *If NO, exclude*

≥18 years of age: Yes  No  *If NO, exclude*

Cognitively aware: Yes  No  *If NO, exclude*

Sufficient English skills: Yes  No  *If NO, exclude*

Willing to give informed consent: Yes  No  *If NO, exclude*

Current foot ulcer on Charcot foot: Yes  No  *If YES, exclude*

Previous amputation on Charcot foot: Yes  No  *If YES, exclude*

**\* If participant satisfies all eligibility criteria, continue with assessment.**

## BASELINE ASSESSMENT

### Participant characteristics

Date of birth:    /    /

Sex:            Male    <sub>1</sub>            Female    <sub>2</sub>

Height: \_\_\_\_\_m      Weight: \_\_\_\_\_kg      BMI (kg/m<sup>2</sup>): \_\_\_\_\_

### Comorbidities

#### **Diabetes mellitus**

Type of diabetes:                                  Type 1          <sub>1</sub>      Type 2          <sub>2</sub>

Date of diagnosis: \_\_\_\_\_ Duration of diabetes (months): \_\_\_\_\_

Latest HbA1c result: \_\_\_\_\_ (%)

**Dyslipidaemia**                                  Yes          <sub>1</sub>                  No          <sub>2</sub>

**Hypertension**                                  Yes          <sub>1</sub>                  No          <sub>2</sub>

**Ischaemic heart disease**                                  Yes          <sub>1</sub>                  No          <sub>2</sub>

**Congestive heart failure**                                  Yes          <sub>1</sub>                  No          <sub>2</sub>

**Cerebrovascular disease**                                  Yes          <sub>1</sub>                  No          <sub>2</sub>

**Osteoarthritis**                                  Yes          <sub>1</sub>                  No          <sub>2</sub>

**Inflammatory arthritis**                                  Yes          <sub>1</sub>                  No          <sub>2</sub>

**Other** \_\_\_\_\_

**Foot history**

**Previous foot ulcer**

*Left foot:* Yes <sub>1</sub> No <sub>2</sub>

*Right foot:* Yes <sub>1</sub> No <sub>2</sub>

**Location of previous foot ulcer**

*Left Foot:*

- <sub>1</sub> Digits
- <sub>2</sub> Plantar forefoot
- <sub>3</sub> Plantar midfoot
- <sub>4</sub> Dorsal foot
- <sub>5</sub> Heel
- <sub>6</sub> Multiple areas of the foot

*Right Foot:*

- <sub>1</sub> Digits
- <sub>2</sub> Plantar forefoot
- <sub>3</sub> Plantar midfoot
- <sub>4</sub> Dorsal foot
- <sub>5</sub> Heel
- <sub>6</sub> Multiple areas of the foot

**Duration of previous foot ulcer**

*Left foot:* Duration (months): \_\_\_\_\_

*Right foot:* Duration (months): \_\_\_\_\_

**Charcot foot history**

**Charcot neuroarthropathy**

*Left foot:*

Date of diagnosis: \_\_\_\_\_ Duration of Charcot foot (months): \_\_\_\_\_

Charcot foot pattern:

- <sub>1</sub> Forefoot
- <sub>2</sub> Tarsometatarsal joints
- <sub>3</sub> Naviculocuneiform, talonavicular + calcaneocuboid joints
- <sub>4</sub> Ankle and subtalar joints
- <sub>5</sub> Calcaneus
- <sub>6</sub> Mixed \_\_\_\_\_ (describe)

Current treatment:

- <sub>1</sub> Total contact cast
- <sub>2</sub> Cam Walker
- <sub>3</sub> Charcot Restraint Orthotic Walker (CROW)
- <sub>4</sub> Orthopaedic footwear and/or orthoses
- <sub>5</sub> Other

Duration of treatment (months): \_\_\_\_\_

*Right foot:*

Date of diagnosis: \_\_\_\_\_ Duration of Charcot foot (months): \_\_\_\_\_  
Charcot foot pattern:

- <sub>1</sub> Forefoot
- <sub>2</sub> Tarsometatarsal joints
- <sub>3</sub> Naviculocuneiform, talonavicular + calcaneocuboid joints
- <sub>4</sub> Ankle and subtalar joints
- <sub>5</sub> Calcaneus
- <sub>6</sub> Mixed \_\_\_\_\_ (describe)

Current treatment:

- <sub>1</sub> Total contact cast
- <sub>2</sub> Cam Walker
- <sub>3</sub> Charcot Restraint Orthotic Walker (CROW)
- <sub>4</sub> Orthopaedic footwear and/or orthoses
- <sub>5</sub> Other

Duration of treatment (months): \_\_\_\_\_

**Previous Charcot foot (i.e. resolved)**

*Left foot:*

Charcot foot pattern:

- <sub>1</sub> Forefoot
- <sub>2</sub> Tarsometatarsal joints
- <sub>3</sub> Naviculocuneiform, talonavicular + calcaneocuboid joints
- <sub>4</sub> Ankle and subtalar joints
- <sub>5</sub> Calcaneus
- <sub>6</sub> Mixed \_\_\_\_\_ (describe)

*Right foot:*

Charcot foot pattern:

- <sub>1</sub> Forefoot

- 2 Tarsometatarsal joints
- 3 Naviculocuneiform, talonavicular + calcaneocuboid joints
- 4 Ankle and subtalar joints
- 5 Calcaneus
- 6 Mixed \_\_\_\_\_ (describe)

**Neurological assessment**

**Vibration perception threshold (Neurothesiometer)**

|                   | <b>Trial 1<br/>(V)</b> | <b>Trial 2<br/>(V)</b> | <b>Trial 3<br/>(V)</b> | <b>Average<br/>(V)</b> |
|-------------------|------------------------|------------------------|------------------------|------------------------|
| <b>Left foot</b>  |                        |                        |                        |                        |
| <b>Right foot</b> |                        |                        |                        |                        |

*Note.* Vibration perception threshold >25 V will indicate peripheral neuropathy.

**Protective sensation (Semmes-Weinstein 5.07/10g monofilament)**

|                   | <b>Sites /3 (plantar hallux, plantar 1<sup>st</sup> MTPJ, plantar 5<sup>th</sup> MTPJ)</b> |
|-------------------|--------------------------------------------------------------------------------------------|
| <b>Left foot</b>  |                                                                                            |
| <b>Right foot</b> |                                                                                            |

*Note.* Inability to detect the monofilament at ≥1 site(s) will indicate peripheral neuropathy. MTPJ = Metatarsophalangeal joint.

**Arterial assessment**

**Pedal pulses**

|                   | <b>Dorsalis pedis</b> | <b>Posterior tibial</b> |
|-------------------|-----------------------|-------------------------|
| <b>Left foot</b>  |                       |                         |
| <b>Right foot</b> |                       |                         |

*Note.* P = palpable, NP = not palpable.

**Ankle-Brachial Pressure Index (ABPI) and Toe-Brachial Pressure Index (TBPI)**

|              | <b>Brachial systolic pressure (mmHg)</b> | <b>Ankle systolic pressure (mmHg)</b> | <b>Toe systolic pressure (mmHg)</b> | <b>ABPI</b> | <b>TBPI</b> |
|--------------|------------------------------------------|---------------------------------------|-------------------------------------|-------------|-------------|
| <b>Left</b>  |                                          |                                       |                                     |             |             |
| <b>Right</b> |                                          |                                       |                                     |             |             |

*Note.* ABPI= ankle brachial index; TBPI= toe brachial index. ABPI≤0.9 and/or TBPI≤0.6 will indicate peripheral arterial disease and ABPI>1.3 will indicate arterial calcification.

## DERMAL TEMPERATURE ASSESSMENT

### Examiner 1 – Touch 1

|                                                |                  |  |
|------------------------------------------------|------------------|--|
| Date                                           |                  |  |
| Participant #                                  |                  |  |
| Charcot foot (Left/Right)                      |                  |  |
| Time post 15 minutes acclimatisation (minutes) |                  |  |
| Outside Temperature (°C)                       |                  |  |
| Room temperature (°C)                          |                  |  |
| Site                                           | Temperature (°C) |  |
| 1                                              |                  |  |
| 2                                              |                  |  |
| 3                                              |                  |  |
| 4                                              |                  |  |
| 5                                              |                  |  |
| 6                                              |                  |  |
| 7                                              |                  |  |
| 8                                              |                  |  |
| 9                                              |                  |  |
| 10                                             |                  |  |

### Examiner 1 – Touch 2

|                                                |                  |  |
|------------------------------------------------|------------------|--|
| Date                                           |                  |  |
| Participant #                                  |                  |  |
| Charcot foot (Left/Right)                      |                  |  |
| Time post 15 minutes acclimatisation (minutes) |                  |  |
| Outside Temperature (°C)                       |                  |  |
| Room temperature (°C)                          |                  |  |
| Site                                           | Temperature (°C) |  |
| 1                                              |                  |  |
| 2                                              |                  |  |
| 3                                              |                  |  |
| 4                                              |                  |  |
| 5                                              |                  |  |
| 6                                              |                  |  |
| 7                                              |                  |  |
| 8                                              |                  |  |
| 9                                              |                  |  |
| 10                                             |                  |  |

### Examiner 1 – Non-touch 1

|                                                |                  |  |
|------------------------------------------------|------------------|--|
| Date                                           |                  |  |
| Participant #                                  |                  |  |
| Charcot foot (Left/Right)                      |                  |  |
| Time post 15 minutes acclimatisation (minutes) |                  |  |
| Outside Temperature (°C)                       |                  |  |
| Room temperature (°C)                          |                  |  |
| Site                                           | Temperature (°C) |  |
| 1                                              |                  |  |
| 2                                              |                  |  |
| 3                                              |                  |  |
| 4                                              |                  |  |
| 5                                              |                  |  |
| 6                                              |                  |  |
| 7                                              |                  |  |
| 8                                              |                  |  |
| 9                                              |                  |  |
| 10                                             |                  |  |

### Examiner 1 – Non-touch 2

|                                                |                  |  |
|------------------------------------------------|------------------|--|
| Date                                           |                  |  |
| Participant #                                  |                  |  |
| Charcot foot (Left/Right)                      |                  |  |
| Time post 15 minutes acclimatisation (minutes) |                  |  |
| Outside Temperature (°C)                       |                  |  |
| Room temperature (°C)                          |                  |  |
| Site                                           | Temperature (°C) |  |
| 1                                              |                  |  |
| 2                                              |                  |  |
| 3                                              |                  |  |
| 4                                              |                  |  |
| 5                                              |                  |  |
| 6                                              |                  |  |
| 7                                              |                  |  |
| 8                                              |                  |  |
| 9                                              |                  |  |
| 10                                             |                  |  |

**Examiner 2 – Touch 1**

| Date                                           |                  |
|------------------------------------------------|------------------|
| Participant #                                  |                  |
| Charcot foot (Left/Right)                      |                  |
| Time post 15 minutes acclimatisation (minutes) |                  |
| Outside Temperature (°C)                       |                  |
| Room temperature (°C)                          |                  |
| Site                                           | Temperature (°C) |
| 1                                              |                  |
| 2                                              |                  |
| 3                                              |                  |
| 4                                              |                  |
| 5                                              |                  |
| 6                                              |                  |
| 7                                              |                  |
| 8                                              |                  |
| 9                                              |                  |
| 10                                             |                  |

**Examiner 2 – Touch 2**

| Date                                           |                  |
|------------------------------------------------|------------------|
| Participant #                                  |                  |
| Charcot foot (Left/Right)                      |                  |
| Time post 15 minutes acclimatisation (minutes) |                  |
| Outside Temperature (°C)                       |                  |
| Room temperature (°C)                          |                  |
| Site                                           | Temperature (°C) |
| 1                                              |                  |
| 2                                              |                  |
| 3                                              |                  |
| 4                                              |                  |
| 5                                              |                  |
| 6                                              |                  |
| 7                                              |                  |
| 8                                              |                  |
| 9                                              |                  |
| 10                                             |                  |

**Examiner 2 – Non-touch 1**

| Date                                           |                  |
|------------------------------------------------|------------------|
| Participant #                                  |                  |
| Charcot foot (Left/Right)                      |                  |
| Time post 15 minutes acclimatisation (minutes) |                  |
| Outside Temperature (°C)                       |                  |
| Room temperature (°C)                          |                  |
| Site                                           | Temperature (°C) |
| 1                                              |                  |
| 2                                              |                  |
| 3                                              |                  |
| 4                                              |                  |
| 5                                              |                  |
| 6                                              |                  |
| 7                                              |                  |
| 8                                              |                  |
| 9                                              |                  |
| 10                                             |                  |

**Examiner 2 – Non-touch 2**

| Date                                           |                  |
|------------------------------------------------|------------------|
| Participant #                                  |                  |
| Charcot foot (Left/Right)                      |                  |
| Time post 15 minutes acclimatisation (minutes) |                  |
| Outside Temperature (°C)                       |                  |
| Room temperature (°C)                          |                  |
| Site                                           | Temperature (°C) |
| 1                                              |                  |
| 2                                              |                  |
| 3                                              |                  |
| 4                                              |                  |
| 5                                              |                  |
| 6                                              |                  |
| 7                                              |                  |
| 8                                              |                  |
| 9                                              |                  |
| 10                                             |                  |
